# Supplementary figures and images for: Loss of cell adhesion molecule CHL1 improves homeostatic adaptation and survival in hypoxic stress
Source: PubMed Central journal article supplement — Cell Death Dis. 2013 Aug 15;4(8):e768–. doi: 10.1038/cddis.2013.284 (PMC3763446; doi:10.1038/cddis.2013.284), 2013-08-15

A

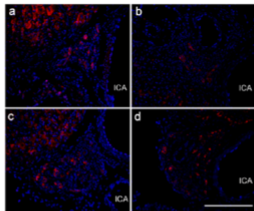

B

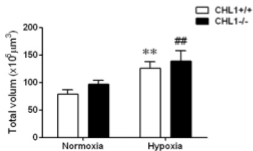

C

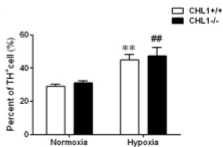

Supplement: cddis2013284x1.pdf [file cddis2013284x1.pdf]
